# Supplementary material
Source: PubMed Central journal article supplement (PMC7185887)
Supplement: NIHMS1521992-supplement-1.pdf [file NIHMS1521992-supplement-1.pdf]

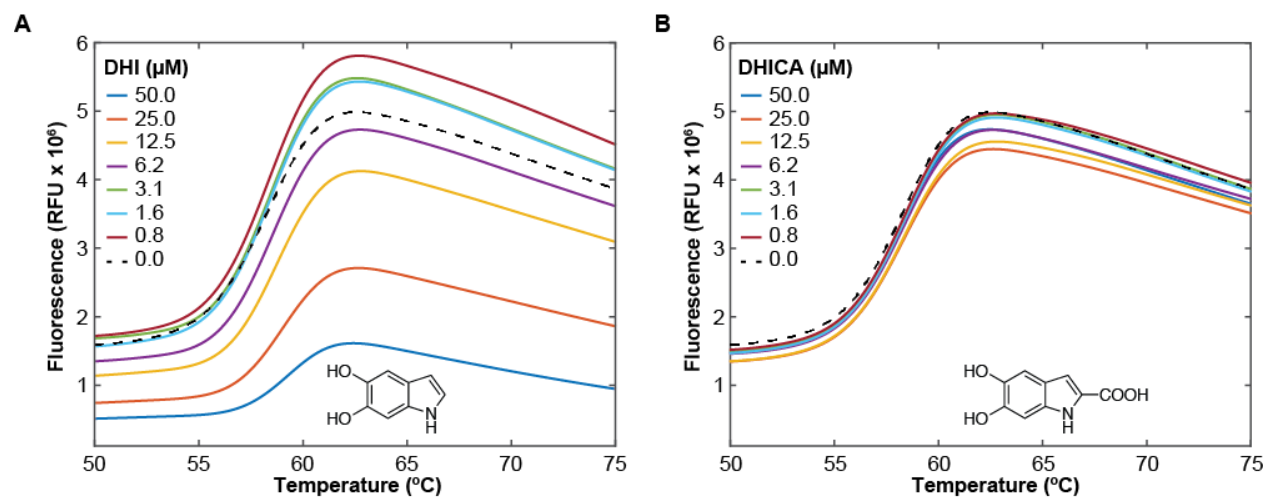

**Figure S1. (Related to Figure 2)** DHI but not DHICA decreases the overall SYPRO orange fluorescence. DSF assays were carried out on the Nurr1 LBD (4 μM) in the presence of the dye SYPRO orange (2.5x) and varying concentrations of DHI or DHICA. **(A, B)** Plot of the fluorescence (RFU) as a function of temperature for Nurr1 in the presence of increasing concentrations of (A) DHI and (B) DHICA. Experiments were performed in triplicate.

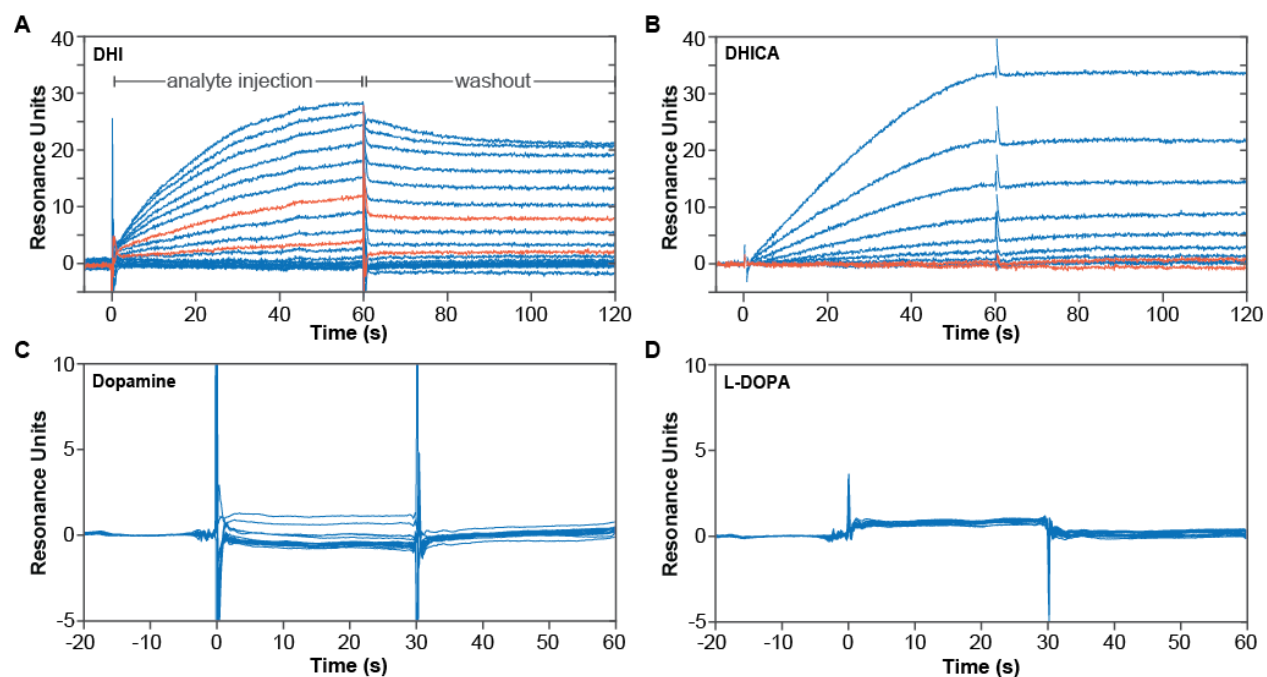

**Figure S2. (Related to Figure 3)** Specific association of DHI, but not DHICA, dopamine or L-DOPA, with the Nurr1 LBD measured by surface plasmon resonance. Biotinylated Nurr1 LBD was coupled to a streptavidin-coated biosensor chip and exposed to analytes at varying concentrations without surface regeneration between exposures. **(A)** Concentration-dependent association of DHI with Nurr1 LBD. DHI was injected at 15 increasing concentrations (16.8  $\mu\text{M}$  DHI, 0.6x dilutions down to 0.01  $\mu\text{M}$ ; 60 s association time). Sensorgrams for DHI injections at 0.17 and 0.78  $\mu\text{M}$  are highlighted in orange. **(B)** Non-specific association of DHICA with Nurr1 LBD. DHICA was injected at 11 increasing concentrations (25.9  $\mu\text{M}$  DHICA, 0.6x dilutions down to 0.16  $\mu\text{M}$ ; 60 s association time). Sensorgrams for DHICA injections at 0.16 and 0.73  $\mu\text{M}$  are highlighted in orange. **(C, D)** No association of dopamine or L-DOPA with Nurr1 LBD. Analytes were injected at 16 increasing concentrations (100  $\mu\text{M}$  dopamine or L-DOPA, 0.6x dilutions down to 0.05  $\mu\text{M}$ ; 30 s association time).

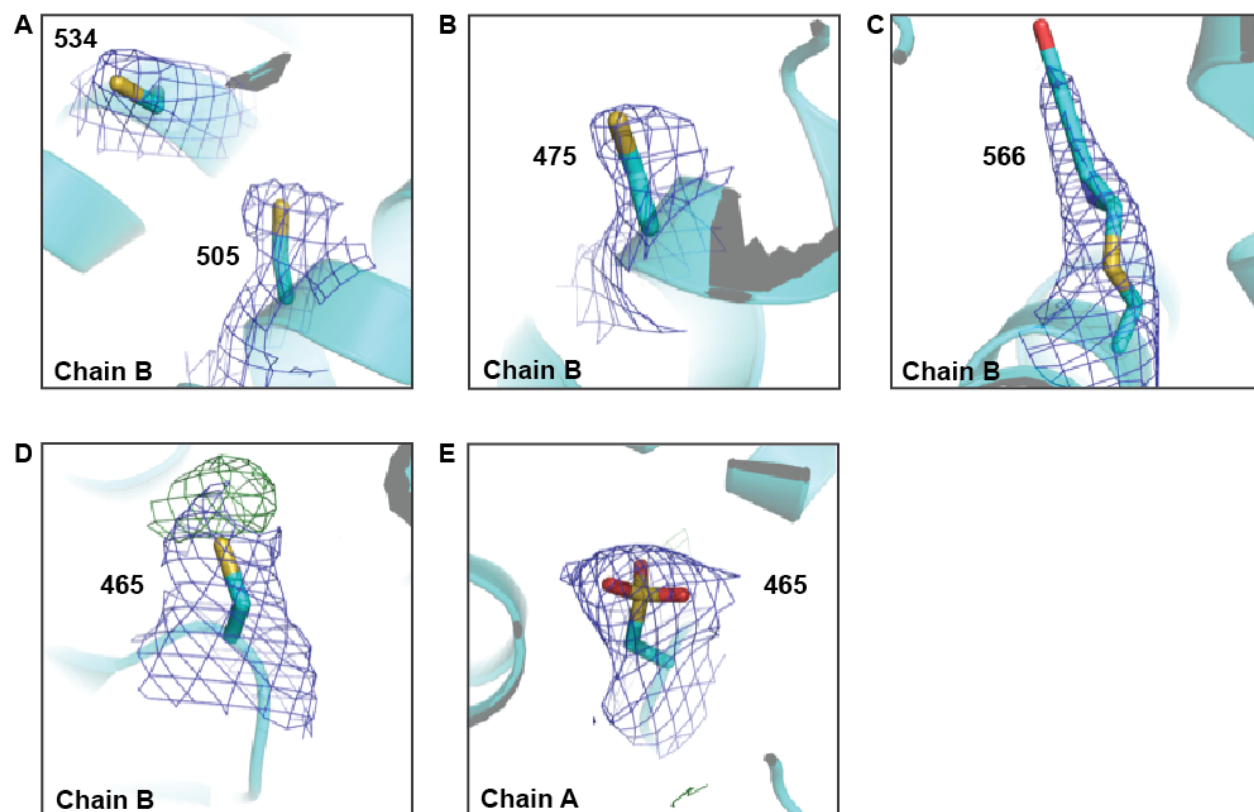

**Figure S3. (Related to Figure 4)** Electron density of all cysteine residues in the Nurr1 LBD-IQ structure. Electron density map ( $2mF_o-DF_c$ ; contoured to  $1\sigma$ ) is shown in blue mesh. Difference density map ( $mF_o-DF_c$ ; contoured to  $3\sigma$ ) is shown in green mesh. Cysteines 534, 505, and 475 show no positive density around their respective sulfur atoms in all three chains (data for Chain B shown), whereas Cys566 shows positive electron density around its sulfur atom that is consistent with the IQ-adduct in each chain. Cysteine 465 shows positive electron density around the sulfur atom in Chain B and Chain A. However, an IQ adduct at this position is precluded by severe steric clashes. Rather, the electron density is satisfied by modeling oxidized cysteine (sulfonic acid) at this position in Chain A (70% occupancy), but not Chain B, using occupancy refinement; accordingly, Cys465 of Chain B still shows positive electron density around its sulfur atom. Notably, Cys465 is near two arginine residues (Arg450 and Arg454) that could favorably interact with oxidized cysteine.

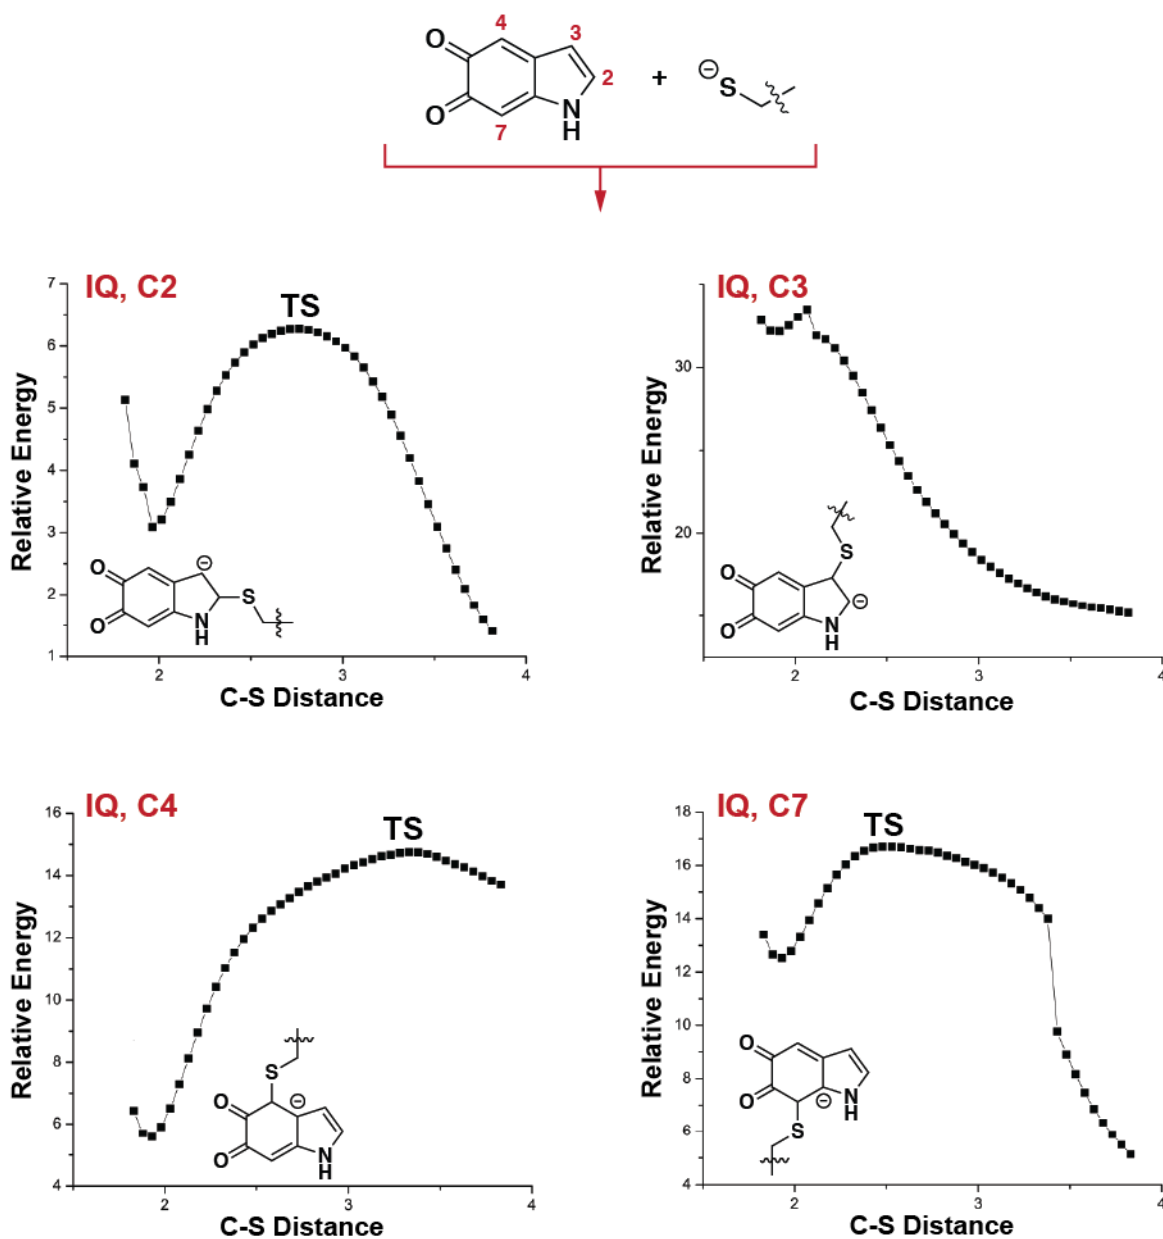

**Figure S4. (Related to Figure 4)** Potential energy surface for thiolate attack on IQ (indolequinone) at each of four potentially reactive sites (C2, C3, C4, C7). The reactions at positions C2, C4, and C7 exhibit an observable energy barrier, 6.3, 14.7 and 16.7 kcal/mol respectively, suggesting the existence of a stable C-S linked reaction product. The low reaction energy barrier observed for the reaction at C2 suggests reversibility. C-S distances are in Å; relative energies are in kcal/mol; TS = transition state.

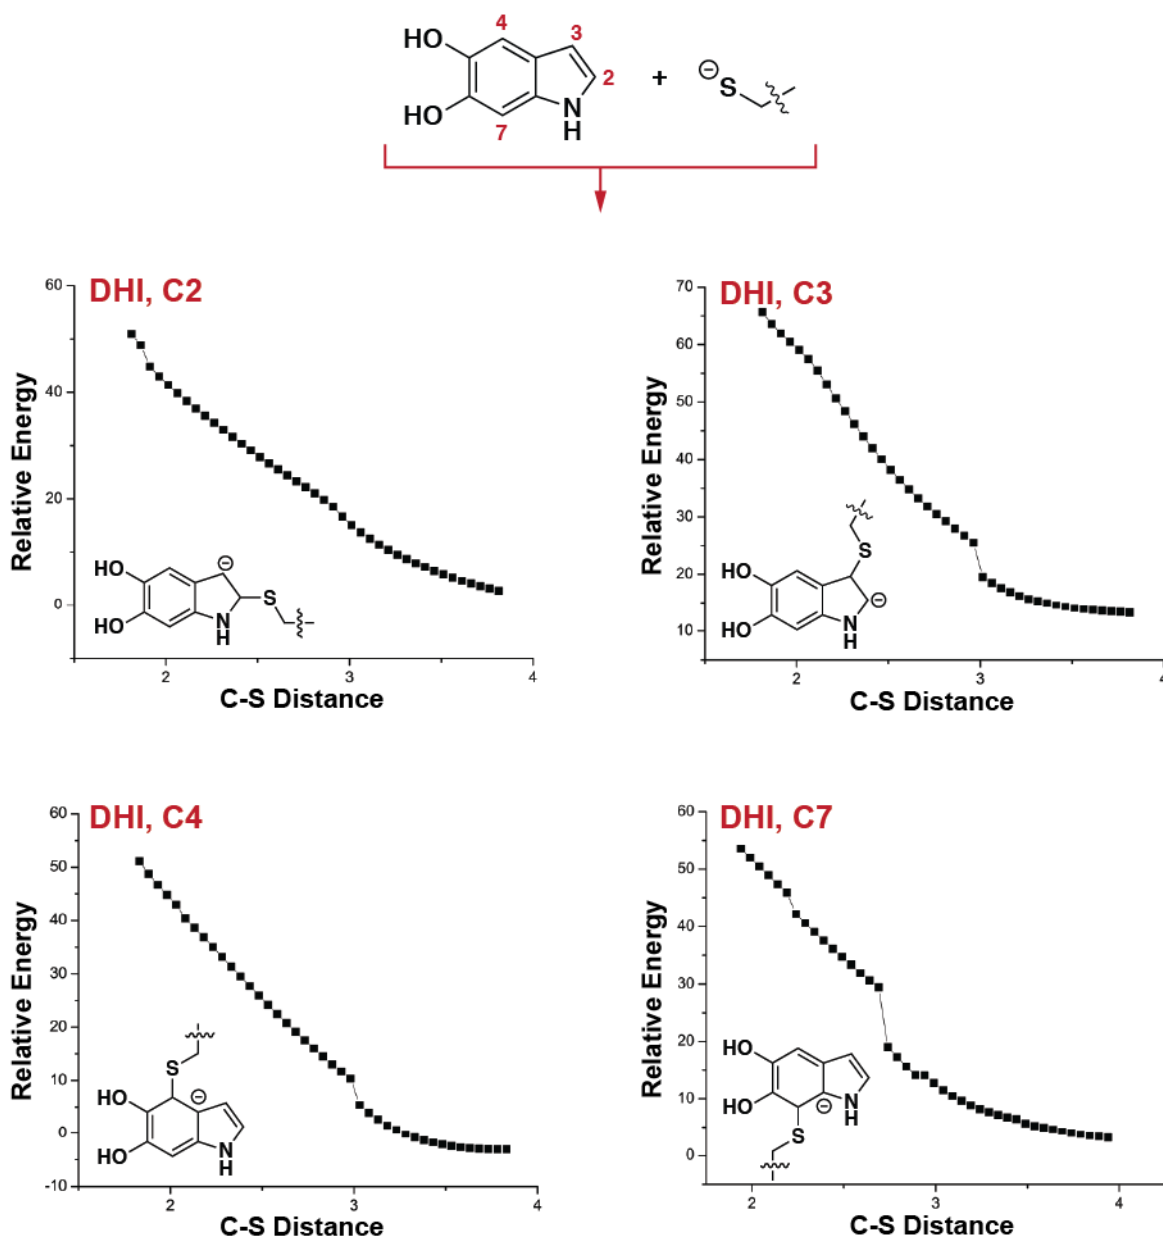

**Figure S5. (Related to Figure 4)** Potential energy surface for thiolate attack on DHI (catechol) at each of four potentially reactive sites (C2, C3, C4, C7). None of these reactions exhibit an energy barrier that would indicate formation of a stable C-S bond at any site. C-S distances are in Å; relative energies are in kcal/mol.

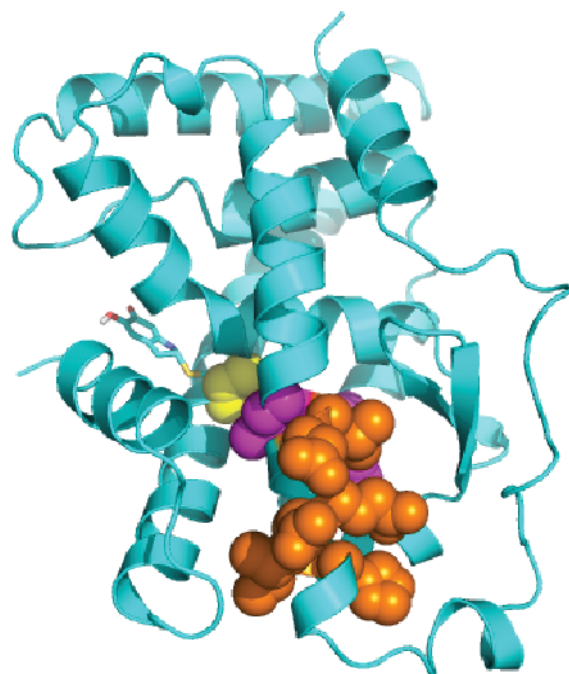

- Poppe et al., 2007 (1H-benzo[d]imidazol-2-amine scaffold)
- Kim et al., 2015 (amodiaquine)
- de Vera et al., 2016 (docosahexaenoic acid)

**Figure S6. (Related to Figures 4 and 7)** The DHI/IQ binding site is distinct from the amodiaquine and docosahexaenoic acid binding sites. IQ adduct shown as sticks. Amino acid residues implicated in binding other ligands by NMR spectroscopy are shown as spheres. Poppe et al. identified Cys566 (yellow spheres) as part of the binding site for benzimidazole-like compounds. Kim et al., identified residues (magenta spheres) forming a non-canonical binding site for amodiaquine. de Vera et al., identified residues (orange spheres) forming a canonical binding site for fatty acids.



**Table S2. (Related to Figure 3) Data collection and refinement statistics.**

|                                       | <b>Nurr1-DHI/IQ<sup>#</sup></b> |
|---------------------------------------|---------------------------------|
| <b>Wavelength</b>                     | 1.116                           |
| <b>Resolution range</b>               | 40.29 - 3.2 (3.314 - 3.2)       |
| <b>Space group</b>                    | P 31 2 1                        |
| <b>Unit cell</b>                      | 80.586 80.586 225.805 90 90 120 |
| <b>Total reflections</b>              | 169966 (16629)                  |
| <b>Unique reflections</b>             | 14697 (1414)                    |
| <b>Multiplicity</b>                   | 11.6 (11.7)                     |
| <b>Completeness (%)</b>               | 99.58 (99.58)                   |
| <b>Mean I/sigma(I)</b>                | 13.74 (1.22)                    |
| <b>Wilson B-factor</b>                | 98.95                           |
| <b>R-merge</b>                        | 0.201 (2.643)                   |
| <b>R-meas</b>                         | 0.2103 (2.762)                  |
| <b>R-pim</b>                          | 0.06123 (0.7986)                |
| <b>CC1/2</b>                          | 0.999 (0.561)                   |
| <b>CC*</b>                            | 1 (0.848)                       |
| <b>Reflections used in refinement</b> | 14647 (1413)                    |
| <b>Reflections used for R-free</b>    | 1445 (140)                      |
| <b>R-work</b>                         | 0.2489 (0.4005)                 |
| <b>R-free</b>                         | 0.2954 (0.4024)                 |
| <b>CC(work)</b>                       | 0.962 (0.614)                   |
| <b>CC(free)</b>                       | 0.901 (0.527)                   |
| <b>Number of non-hydrogen atoms</b>   | 5529                            |
| <b>macromolecules</b>                 | 5517                            |
| <b>ligands</b>                        | 12                              |
| <b>Protein residues</b>               | 685                             |
| <b>RMS(bonds)</b>                     | 0.011                           |
| <b>RMS(angles)</b>                    | 1.47                            |
| <b>Ramachandran favored (%)</b>       | 96.05                           |
| <b>Ramachandran allowed (%)</b>       | 3.49                            |
| <b>Ramachandran outliers (%)</b>      | 0.46                            |
| <b>Rotamer outliers (%)</b>           | 0.99                            |
| <b>Clashscore</b>                     | 24.39                           |
| <b>Average B-factor</b>               | 120.83                          |
| <b>macromolecules</b>                 | 120.85                          |
| <b>ligands</b>                        | 111.03                          |
| <b>Number of TLS groups</b>           | 13                              |

<sup>#</sup>Statistics for the highest-resolution shell are shown in parentheses.



**Table S3. (Related to Figure 3)** Polder map statistics for Cys566-IQ adduct. Only IQ atoms (i.e. no Cys566 atoms) were used in the calculations.

|              |        |
|--------------|--------|
| CC(1,2)      | 0.6288 |
| CC(1,3)      | 0.7835 |
| CC(2,3)      | 0.6191 |
| Peak CC(1,2) | 0.6465 |
| Peak CC(1,3) | 0.7748 |
| Peak CC(2,3) | 0.6200 |

**Table S4. (Related to Star Methods)** Nurr1 LBD construct names, corresponding protein sequence, and associated experiments.

| <b>Construct Name</b>                                                                            | <b>Protein Sequence</b>                                                                                                                                                                                                                                                                                                                                                            |
|--------------------------------------------------------------------------------------------------|------------------------------------------------------------------------------------------------------------------------------------------------------------------------------------------------------------------------------------------------------------------------------------------------------------------------------------------------------------------------------------|
| 6xHis Tag – TEV Cleavage Site – Nurr1 LBD (Ser-328-598)<br><i>Used for x-ray crystallography</i> | MGSS <b>HHHHH</b> HSQDPGSS <b>ENLYFQS</b> <sup>328</sup> MVKEVVRTDSLKGRRGRLPS<br>KPKSPQEPPSPV <sup>363</sup> SLISALVRAHVDSNPAMTSLDYSRFQANPDY<br>QMSGDDTQHIQQFYDLLTGSMEIIRGWAEKIPGFADLPKADQDLLFES<br>AFLELFVLRRLAYRSNPVEGKLIFCNGVVLHRLQCVRGFGGEWIDSIVEFS<br>SNLQNMNIDISAFSCIAALAMVTERHGLKEPKRVEELQNKIVNCLKDHV<br>TFNNGGLNRPNYLSKLLGKLPPELRTLCTQGLQRIFYLKLEDLVPPPAIID<br>KLFLDTLPF** |
| 6xHis Tag – Nurr1 LBD (363-598)<br><i>Used for thermal shift assays</i>                          | MKK <b>GHHHHH</b> HGAI <sup>363</sup> SLISALVRAHVDSNPAMTSLDYSRFQANPDYQ<br>MSGDDTQHIQQFYDLLTGSMEIIRGWAEKIPGFADLPKADQDLLFESA<br>FLELFVLRRLAYRSNPVEGKLIFCNGVVLHRLQCVRGFGGEWIDSIVEFSS<br>NLQNMNIDISAFSCIAALAMVTERHGLKEPKRVEELQNKIVNCLKDHVT<br>FNNGGLNRPNYLSKLLGKLPPELRTLCTQGLQRIFYLKLEDLVPPPAIIDK<br>LFLDTLPF**                                                                        |
| 6xHis Tag – Avi Tag – Nurr1 LBD (363-598)<br><i>Used for surface plasmon resonance assays</i>    | MGSS <b>HHHHH</b> HSQDPG <b>SLNDIFEAQKIEWHE</b> GSGSG <sup>363</sup> SLISALVRA<br>HVDSNPAMTSLDYSRFQANPDYQMSGDDTQHIQQFYDLLTGSMEIIR<br>GWAEKIPGFADLPKADQDLLFESAFLELFVLRRLAYRSNPVEGKLIFCNG<br>VVLHRLQCVRGFGGEWIDSIVEFSSNLQNMNIDISAFSCIAALAMVTERH<br>GLKEPKRVEELQNKIVNCLKDHVTFNNGGLNRPNYLSKLLGKLPPELRT<br>LCTQGLQRIFYLKLEDLVPPPAIIDKLFLDTLPF**                                         |

**Bolded sequences:** 6xHis Tag (HHHHH); TEV recognition sequence (ENLYFQS); BirA biotinylation recognition sequence (GLNDIFEAQKIEWHE).

**Table S5. (Related to Star Methods) Primers used for qPCR.**

| <b>Gene name</b>               | <b>Gene ID number</b> | <b>Forward Primer</b>    | <b>Reverse Primer</b>    |
|--------------------------------|-----------------------|--------------------------|--------------------------|
| <i>nurr1</i> (NR4A2)           | NM_001113484.1        | CAGGTCCAACCCGATG<br>GAAA | TCCGTGTCTCTCTGTG<br>ACCA |
| <i>th</i>                      | NM_131149.1           | GCTCTCAGCACGCGAT<br>TTTT | ATGGACGCAATCCGG<br>TTCAG |
| <i>vmat2</i> (slc18a2)         | NM_001256225.2        | TCTTCTGTGGCAGGTA<br>TGGG | CCTCCAGTGCAATCC<br>CAAT  |
| <i>dat</i> (slc6a3)            | NM_131755.1           | TGCTACAAGAATGGCG<br>GAGG | GTAGGAGCCCACATA<br>CAGCG |
| <i>ddc</i> (addc)              | NM_213342.1           | CAAAGGAGGTGGGGT<br>CATCC | CACCGATGAGTGTGC<br>CTGAT |
| <i>elf1<math>\alpha</math></i> | NM_131263.1           | TTCTCAGGCTGACTGT<br>GC   | CCGCTAGCATTACCCT<br>CC   |
